# Supplementary material for: Consensus report from the 10th Global Forum for Liver Magnetic Resonance Imaging: developments in HCC management
Source: PubMed Central journal article supplement (PMC10730664; doi:10.1007/s00330-023-09928-y), 2023-07-27
Supplement: 330_2023_9928_MOESM1_ESM.pdf [file 330_2023_9928_MOESM1_ESM.pdf]

**Consensus report from the 10th Global Forum for Liver Magnetic Resonance  
Imaging: developments in HCC management**

**Electronic Supplementary Material**

## Questionnaire survey results: global survey on gadoxetic acid usage

A survey developed by Professor Taouli and a Bayer research team was completed by 453 radiologists from China, Germany, Italy, Japan, South Korea, and USA in advance of the 10th Global Liver Forum to explore current practice in liver MRI. Professor Taouli presented and commented on the survey results at the Forum.

| <p><b>Survey methodology</b></p> <p>The survey was a quantitative, double-blinded 25-minute online questionnaire performed between August 2021 and December 2021 by specialized/board radiologists who had been certified for at least 3 years and fewer than 35 years. The participants were from China (<math>n = 101</math>), Germany (<math>n = 80</math>), Italy (<math>n = 52</math>), Japan (<math>n = 70</math>), South Korea (<math>n = 50</math>), and USA (<math>n = 110</math>).</p> |                                                                                                                                                                                                                                                                                                                                                                                                                                                                                                                                                                                                                                                                                                                                                                                                                                                                                                                                                                                                                                              |            |            |                               |     |                            |     |                       |     |                                    |     |                                        |     |                               |    |                      |    |                       |    |                    |    |                        |    |                     |    |                                |    |
|--------------------------------------------------------------------------------------------------------------------------------------------------------------------------------------------------------------------------------------------------------------------------------------------------------------------------------------------------------------------------------------------------------------------------------------------------------------------------------------------------|----------------------------------------------------------------------------------------------------------------------------------------------------------------------------------------------------------------------------------------------------------------------------------------------------------------------------------------------------------------------------------------------------------------------------------------------------------------------------------------------------------------------------------------------------------------------------------------------------------------------------------------------------------------------------------------------------------------------------------------------------------------------------------------------------------------------------------------------------------------------------------------------------------------------------------------------------------------------------------------------------------------------------------------------|------------|------------|-------------------------------|-----|----------------------------|-----|-----------------------|-----|------------------------------------|-----|----------------------------------------|-----|-------------------------------|----|----------------------|----|-----------------------|----|--------------------|----|------------------------|----|---------------------|----|--------------------------------|----|
| <p><b>Referrals for imaging</b></p> <p>Referrals for liver imaging (CT or MRI) came almost equally from abdominal/liver surgeons, oncologists, hepatologists, and gastroenterologists, with the remainder from internal medicine physicians, general practitioners (GP)/primary care physicians (PCP), and other.</p>                                                                                                                                                                            | <p><b>Referrals for liver imaging come almost equally from surgeons, oncologists, hepatologists, and gastroenterologists</b></p> 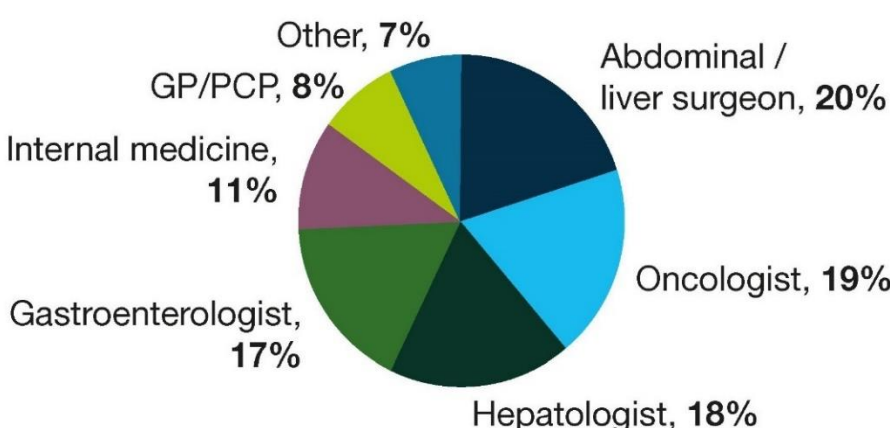 <table border="1"> <thead> <tr> <th>Specialty</th> <th>Percentage</th> </tr> </thead> <tbody> <tr> <td>Abdominal / liver surgeon</td> <td>20%</td> </tr> <tr> <td>Oncologist</td> <td>19%</td> </tr> <tr> <td>Hepatologist</td> <td>18%</td> </tr> <tr> <td>Gastroenterologist</td> <td>17%</td> </tr> <tr> <td>Internal medicine</td> <td>11%</td> </tr> <tr> <td>GP/PCP</td> <td>8%</td> </tr> <tr> <td>Other</td> <td>7%</td> </tr> </tbody> </table>                                                                                                                                                                                                                                                                                                                                                                | Specialty  | Percentage | Abdominal / liver surgeon     | 20% | Oncologist                 | 19% | Hepatologist          | 18% | Gastroenterologist                 | 17% | Internal medicine                      | 11% | GP/PCP                        | 8% | Other                | 7% |                       |    |                    |    |                        |    |                     |    |                                |    |
| Specialty                                                                                                                                                                                                                                                                                                                                                                                                                                                                                        | Percentage                                                                                                                                                                                                                                                                                                                                                                                                                                                                                                                                                                                                                                                                                                                                                                                                                                                                                                                                                                                                                                   |            |            |                               |     |                            |     |                       |     |                                    |     |                                        |     |                               |    |                      |    |                       |    |                    |    |                        |    |                     |    |                                |    |
| Abdominal / liver surgeon                                                                                                                                                                                                                                                                                                                                                                                                                                                                        | 20%                                                                                                                                                                                                                                                                                                                                                                                                                                                                                                                                                                                                                                                                                                                                                                                                                                                                                                                                                                                                                                          |            |            |                               |     |                            |     |                       |     |                                    |     |                                        |     |                               |    |                      |    |                       |    |                    |    |                        |    |                     |    |                                |    |
| Oncologist                                                                                                                                                                                                                                                                                                                                                                                                                                                                                       | 19%                                                                                                                                                                                                                                                                                                                                                                                                                                                                                                                                                                                                                                                                                                                                                                                                                                                                                                                                                                                                                                          |            |            |                               |     |                            |     |                       |     |                                    |     |                                        |     |                               |    |                      |    |                       |    |                    |    |                        |    |                     |    |                                |    |
| Hepatologist                                                                                                                                                                                                                                                                                                                                                                                                                                                                                     | 18%                                                                                                                                                                                                                                                                                                                                                                                                                                                                                                                                                                                                                                                                                                                                                                                                                                                                                                                                                                                                                                          |            |            |                               |     |                            |     |                       |     |                                    |     |                                        |     |                               |    |                      |    |                       |    |                    |    |                        |    |                     |    |                                |    |
| Gastroenterologist                                                                                                                                                                                                                                                                                                                                                                                                                                                                               | 17%                                                                                                                                                                                                                                                                                                                                                                                                                                                                                                                                                                                                                                                                                                                                                                                                                                                                                                                                                                                                                                          |            |            |                               |     |                            |     |                       |     |                                    |     |                                        |     |                               |    |                      |    |                       |    |                    |    |                        |    |                     |    |                                |    |
| Internal medicine                                                                                                                                                                                                                                                                                                                                                                                                                                                                                | 11%                                                                                                                                                                                                                                                                                                                                                                                                                                                                                                                                                                                                                                                                                                                                                                                                                                                                                                                                                                                                                                          |            |            |                               |     |                            |     |                       |     |                                    |     |                                        |     |                               |    |                      |    |                       |    |                    |    |                        |    |                     |    |                                |    |
| GP/PCP                                                                                                                                                                                                                                                                                                                                                                                                                                                                                           | 8%                                                                                                                                                                                                                                                                                                                                                                                                                                                                                                                                                                                                                                                                                                                                                                                                                                                                                                                                                                                                                                           |            |            |                               |     |                            |     |                       |     |                                    |     |                                        |     |                               |    |                      |    |                       |    |                    |    |                        |    |                     |    |                                |    |
| Other                                                                                                                                                                                                                                                                                                                                                                                                                                                                                            | 7%                                                                                                                                                                                                                                                                                                                                                                                                                                                                                                                                                                                                                                                                                                                                                                                                                                                                                                                                                                                                                                           |            |            |                               |     |                            |     |                       |     |                                    |     |                                        |     |                               |    |                      |    |                       |    |                    |    |                        |    |                     |    |                                |    |
| <p>The most common reasons for referrals for liver MRI were indeterminate lesions on US or CT, HCC screening/surveillance, HCC diagnosis/staging, liver metastases diagnosis and staging, and diseases of the biliary system or pancreatic disease.</p>                                                                                                                                                                                                                                          | <p><b>Indications for liver MRI</b></p> <p><b>Most frequent: indeterminate lesion on US/CT</b></p>  <table border="1"> <thead> <tr> <th>Indication</th> <th>Percentage</th> </tr> </thead> <tbody> <tr> <td>Indeterminate lesion on US/CT</td> <td>17%</td> </tr> <tr> <td>HCC screening/surveillance</td> <td>12%</td> </tr> <tr> <td>HCC diagnosis/staging</td> <td>12%</td> </tr> <tr> <td>Liver metastases diagnosis/staging</td> <td>11%</td> </tr> <tr> <td>Biliary/gallbladder/pancreatic disease</td> <td>10%</td> </tr> <tr> <td>Liver metastases surveillance</td> <td>9%</td> </tr> <tr> <td>Benign liver lesions</td> <td>8%</td> </tr> <tr> <td>Diffuse liver disease</td> <td>7%</td> </tr> <tr> <td>Cholangiocarcinoma</td> <td>6%</td> </tr> <tr> <td>Liver vascular imaging</td> <td>4%</td> </tr> <tr> <td>Liver donor imaging</td> <td>2%</td> </tr> <tr> <td>Pre/post-transplant evaluation</td> <td>2%</td> </tr> </tbody> </table> | Indication | Percentage | Indeterminate lesion on US/CT | 17% | HCC screening/surveillance | 12% | HCC diagnosis/staging | 12% | Liver metastases diagnosis/staging | 11% | Biliary/gallbladder/pancreatic disease | 10% | Liver metastases surveillance | 9% | Benign liver lesions | 8% | Diffuse liver disease | 7% | Cholangiocarcinoma | 6% | Liver vascular imaging | 4% | Liver donor imaging | 2% | Pre/post-transplant evaluation | 2% |
| Indication                                                                                                                                                                                                                                                                                                                                                                                                                                                                                       | Percentage                                                                                                                                                                                                                                                                                                                                                                                                                                                                                                                                                                                                                                                                                                                                                                                                                                                                                                                                                                                                                                   |            |            |                               |     |                            |     |                       |     |                                    |     |                                        |     |                               |    |                      |    |                       |    |                    |    |                        |    |                     |    |                                |    |
| Indeterminate lesion on US/CT                                                                                                                                                                                                                                                                                                                                                                                                                                                                    | 17%                                                                                                                                                                                                                                                                                                                                                                                                                                                                                                                                                                                                                                                                                                                                                                                                                                                                                                                                                                                                                                          |            |            |                               |     |                            |     |                       |     |                                    |     |                                        |     |                               |    |                      |    |                       |    |                    |    |                        |    |                     |    |                                |    |
| HCC screening/surveillance                                                                                                                                                                                                                                                                                                                                                                                                                                                                       | 12%                                                                                                                                                                                                                                                                                                                                                                                                                                                                                                                                                                                                                                                                                                                                                                                                                                                                                                                                                                                                                                          |            |            |                               |     |                            |     |                       |     |                                    |     |                                        |     |                               |    |                      |    |                       |    |                    |    |                        |    |                     |    |                                |    |
| HCC diagnosis/staging                                                                                                                                                                                                                                                                                                                                                                                                                                                                            | 12%                                                                                                                                                                                                                                                                                                                                                                                                                                                                                                                                                                                                                                                                                                                                                                                                                                                                                                                                                                                                                                          |            |            |                               |     |                            |     |                       |     |                                    |     |                                        |     |                               |    |                      |    |                       |    |                    |    |                        |    |                     |    |                                |    |
| Liver metastases diagnosis/staging                                                                                                                                                                                                                                                                                                                                                                                                                                                               | 11%                                                                                                                                                                                                                                                                                                                                                                                                                                                                                                                                                                                                                                                                                                                                                                                                                                                                                                                                                                                                                                          |            |            |                               |     |                            |     |                       |     |                                    |     |                                        |     |                               |    |                      |    |                       |    |                    |    |                        |    |                     |    |                                |    |
| Biliary/gallbladder/pancreatic disease                                                                                                                                                                                                                                                                                                                                                                                                                                                           | 10%                                                                                                                                                                                                                                                                                                                                                                                                                                                                                                                                                                                                                                                                                                                                                                                                                                                                                                                                                                                                                                          |            |            |                               |     |                            |     |                       |     |                                    |     |                                        |     |                               |    |                      |    |                       |    |                    |    |                        |    |                     |    |                                |    |
| Liver metastases surveillance                                                                                                                                                                                                                                                                                                                                                                                                                                                                    | 9%                                                                                                                                                                                                                                                                                                                                                                                                                                                                                                                                                                                                                                                                                                                                                                                                                                                                                                                                                                                                                                           |            |            |                               |     |                            |     |                       |     |                                    |     |                                        |     |                               |    |                      |    |                       |    |                    |    |                        |    |                     |    |                                |    |
| Benign liver lesions                                                                                                                                                                                                                                                                                                                                                                                                                                                                             | 8%                                                                                                                                                                                                                                                                                                                                                                                                                                                                                                                                                                                                                                                                                                                                                                                                                                                                                                                                                                                                                                           |            |            |                               |     |                            |     |                       |     |                                    |     |                                        |     |                               |    |                      |    |                       |    |                    |    |                        |    |                     |    |                                |    |
| Diffuse liver disease                                                                                                                                                                                                                                                                                                                                                                                                                                                                            | 7%                                                                                                                                                                                                                                                                                                                                                                                                                                                                                                                                                                                                                                                                                                                                                                                                                                                                                                                                                                                                                                           |            |            |                               |     |                            |     |                       |     |                                    |     |                                        |     |                               |    |                      |    |                       |    |                    |    |                        |    |                     |    |                                |    |
| Cholangiocarcinoma                                                                                                                                                                                                                                                                                                                                                                                                                                                                               | 6%                                                                                                                                                                                                                                                                                                                                                                                                                                                                                                                                                                                                                                                                                                                                                                                                                                                                                                                                                                                                                                           |            |            |                               |     |                            |     |                       |     |                                    |     |                                        |     |                               |    |                      |    |                       |    |                    |    |                        |    |                     |    |                                |    |
| Liver vascular imaging                                                                                                                                                                                                                                                                                                                                                                                                                                                                           | 4%                                                                                                                                                                                                                                                                                                                                                                                                                                                                                                                                                                                                                                                                                                                                                                                                                                                                                                                                                                                                                                           |            |            |                               |     |                            |     |                       |     |                                    |     |                                        |     |                               |    |                      |    |                       |    |                    |    |                        |    |                     |    |                                |    |
| Liver donor imaging                                                                                                                                                                                                                                                                                                                                                                                                                                                                              | 2%                                                                                                                                                                                                                                                                                                                                                                                                                                                                                                                                                                                                                                                                                                                                                                                                                                                                                                                                                                                                                                           |            |            |                               |     |                            |     |                       |     |                                    |     |                                        |     |                               |    |                      |    |                       |    |                    |    |                        |    |                     |    |                                |    |
| Pre/post-transplant evaluation                                                                                                                                                                                                                                                                                                                                                                                                                                                                   | 2%                                                                                                                                                                                                                                                                                                                                                                                                                                                                                                                                                                                                                                                                                                                                                                                                                                                                                                                                                                                                                                           |            |            |                               |     |                            |     |                       |     |                                    |     |                                        |     |                               |    |                      |    |                       |    |                    |    |                        |    |                     |    |                                |    |

### MRI contrast agent choice

In the majority of countries, with some variation, the radiologist primarily decides which contrast agent is injected into the patient: up to 99% in Germany, 91% in USA, and slightly less in South Korea, where there is also a decision made by the referring physician.

### Decisions regarding choice of contrast agent largely lie with radiologists

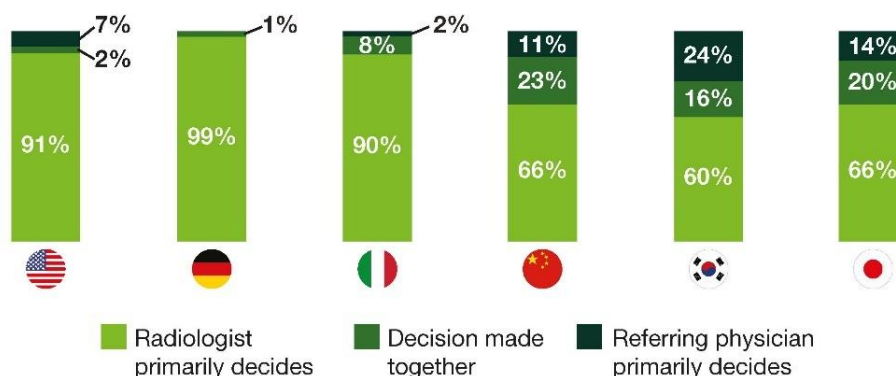

### Liver imaging practice

In most countries, CT is still the predominant liver imaging modality, as expected: from 69% in South Korea to as low as 39% in Italy, but ~40–70% of cases overall.

For MRI, there are a large proportion of images with ECCM and a smaller proportion (about 19–34%) with gadoxetic acid-MRI. Data from a 2016 survey of radiologists in Germany, Italy, and USA show there has been minimal change in the use of gadoxetic acid.

### Liver imaging practice differs by country

#### Korea/Japan: high use of CT and a preference for gadoxetic acid for MRI

2016 data (gadoxetic acid-MRI)

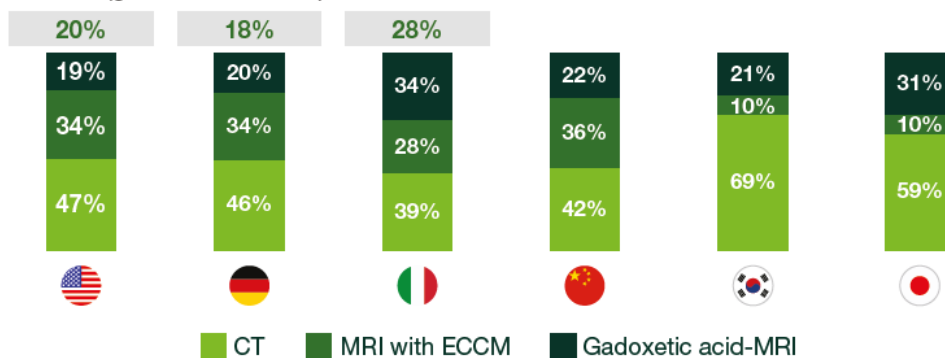

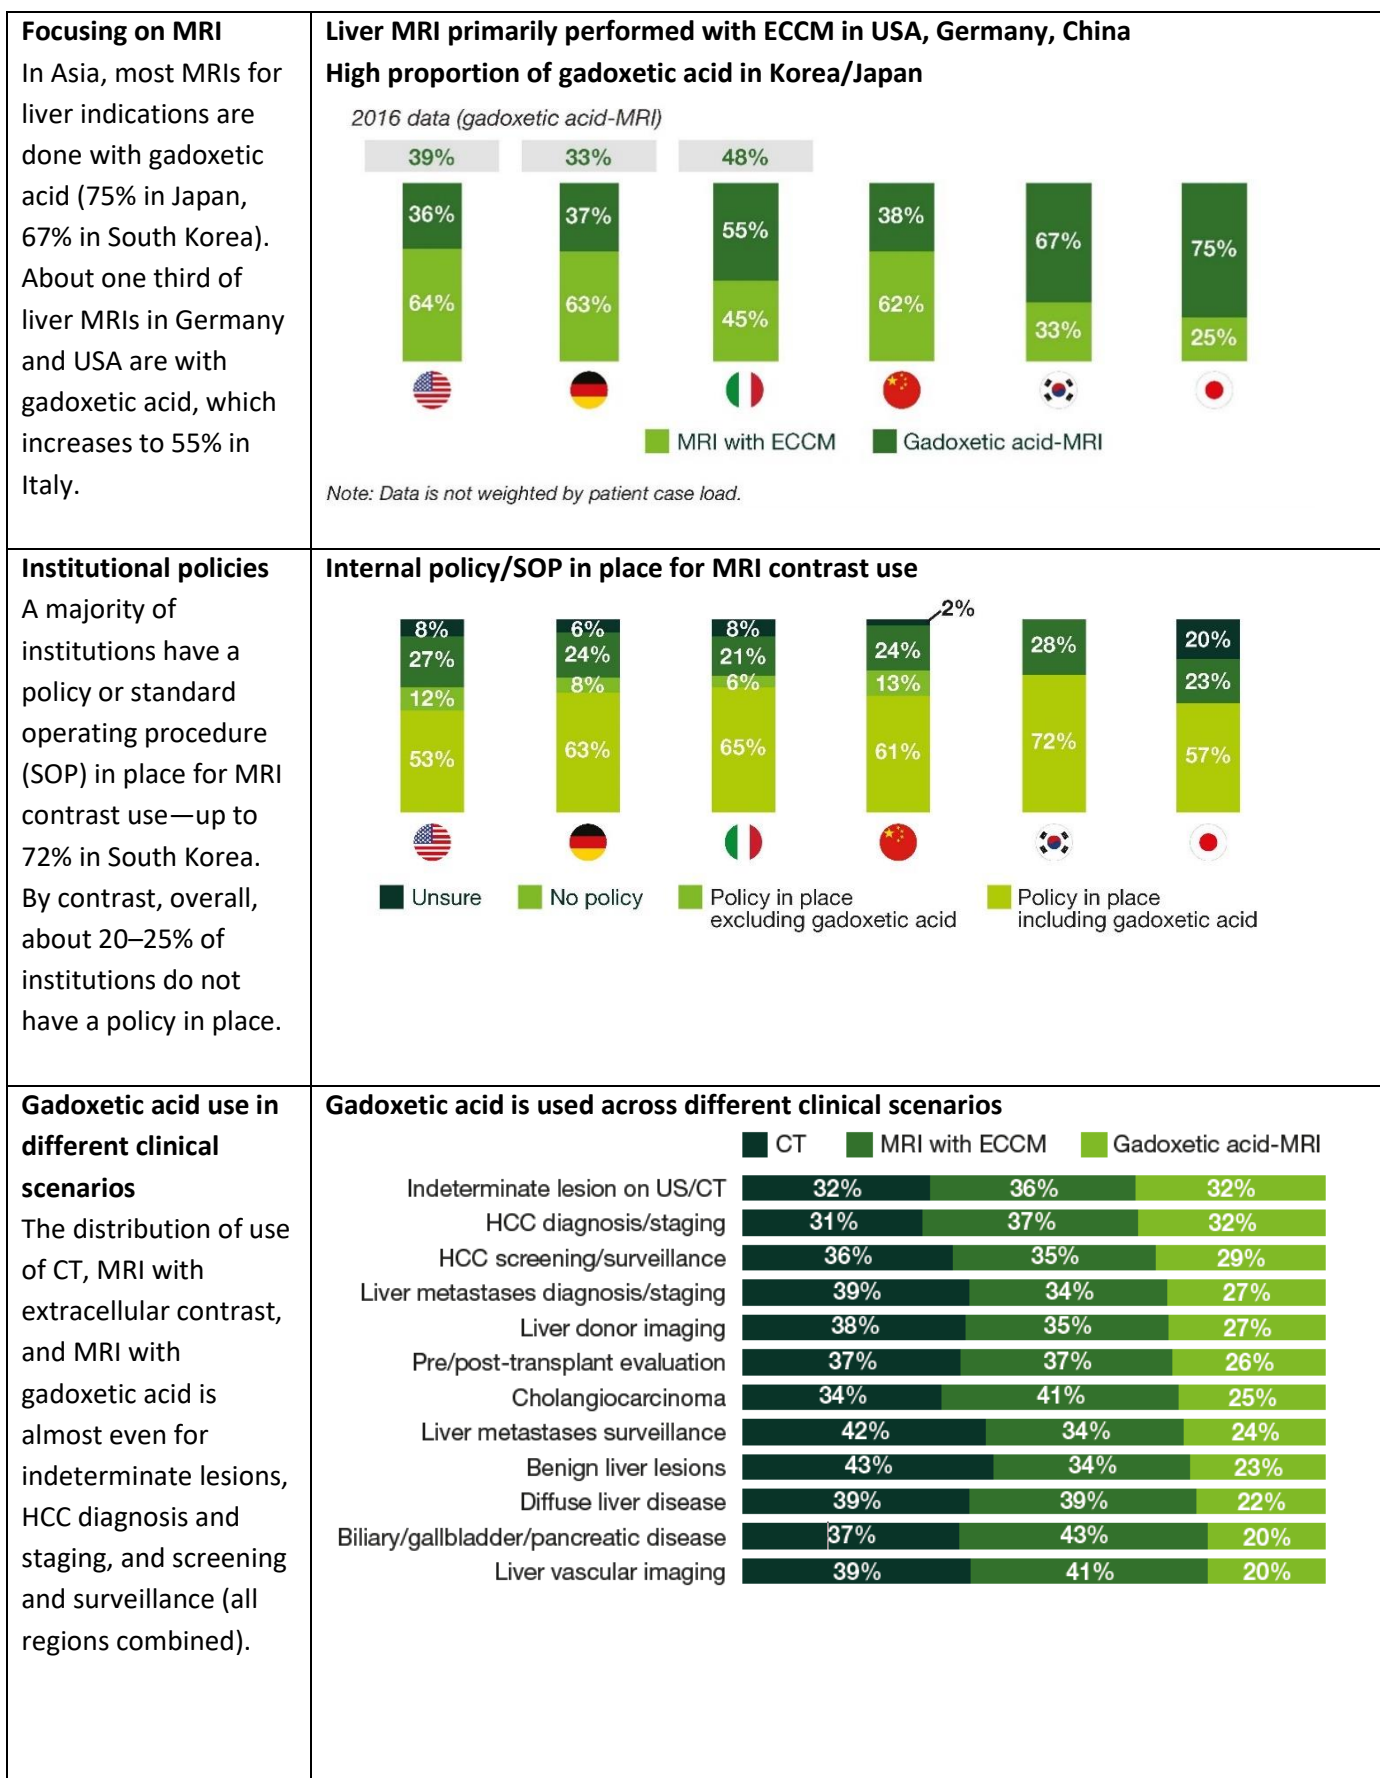

| <p><b>Perceived value of gadoxetic acid-enhanced MRI</b></p> <p>Gadoxetic-enhanced MRI was perceived as valuable or very valuable for problem solving, treatment planning, and treatment follow-up—whether for HCC or metastases.</p>                                                                                                                                                                                     | <p><b>Gadoxetic acid-MRI is most valuable for problem solving</b></p> <p>High perceived value across clinical scenarios in Japan, South Korea, and China</p> 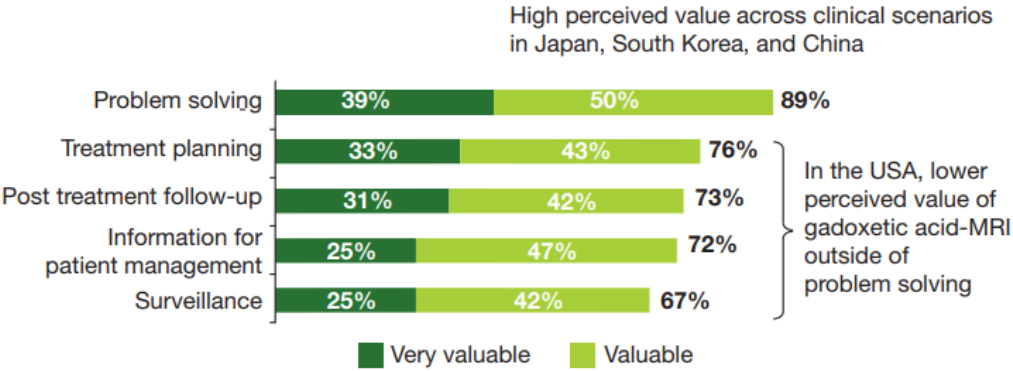 <table border="1"> <thead> <tr> <th>Clinical Scenario</th> <th>Very valuable (%)</th> <th>Valuable (%)</th> <th>Total (%)</th> </tr> </thead> <tbody> <tr> <td>Problem solving</td> <td>39%</td> <td>50%</td> <td>89%</td> </tr> <tr> <td>Treatment planning</td> <td>33%</td> <td>43%</td> <td>76%</td> </tr> <tr> <td>Post treatment follow-up</td> <td>31%</td> <td>42%</td> <td>73%</td> </tr> <tr> <td>Information for patient management</td> <td>25%</td> <td>47%</td> <td>72%</td> </tr> <tr> <td>Surveillance</td> <td>25%</td> <td>42%</td> <td>67%</td> </tr> </tbody> </table> <p>In the USA, lower perceived value of gadoxetic acid-MRI outside of problem solving</p>                                                                                                                                                                                                                                                          | Clinical Scenario     | Very valuable (%)       | Valuable (%)          | Total (%)               | Problem solving | 39% | 50% | 89% | Treatment planning  | 33% | 43% | 76% | Post treatment follow-up                    | 31% | 42% | 73% | Information for patient management | 25% | 47% | 72% | Surveillance                | 25% | 42% | 67% |                                     |    |     |     |                                   |    |     |     |                      |    |     |     |
|---------------------------------------------------------------------------------------------------------------------------------------------------------------------------------------------------------------------------------------------------------------------------------------------------------------------------------------------------------------------------------------------------------------------------|-----------------------------------------------------------------------------------------------------------------------------------------------------------------------------------------------------------------------------------------------------------------------------------------------------------------------------------------------------------------------------------------------------------------------------------------------------------------------------------------------------------------------------------------------------------------------------------------------------------------------------------------------------------------------------------------------------------------------------------------------------------------------------------------------------------------------------------------------------------------------------------------------------------------------------------------------------------------------------------------------------------------------------------------------------------------------------------------------------------------------------------------------------------------------------------------------|-----------------------|-------------------------|-----------------------|-------------------------|-----------------|-----|-----|-----|---------------------|-----|-----|-----|---------------------------------------------|-----|-----|-----|------------------------------------|-----|-----|-----|-----------------------------|-----|-----|-----|-------------------------------------|----|-----|-----|-----------------------------------|----|-----|-----|----------------------|----|-----|-----|
| Clinical Scenario                                                                                                                                                                                                                                                                                                                                                                                                         | Very valuable (%)                                                                                                                                                                                                                                                                                                                                                                                                                                                                                                                                                                                                                                                                                                                                                                                                                                                                                                                                                                                                                                                                                                                                                                             | Valuable (%)          | Total (%)               |                       |                         |                 |     |     |     |                     |     |     |     |                                             |     |     |     |                                    |     |     |     |                             |     |     |     |                                     |    |     |     |                                   |    |     |     |                      |    |     |     |
| Problem solving                                                                                                                                                                                                                                                                                                                                                                                                           | 39%                                                                                                                                                                                                                                                                                                                                                                                                                                                                                                                                                                                                                                                                                                                                                                                                                                                                                                                                                                                                                                                                                                                                                                                           | 50%                   | 89%                     |                       |                         |                 |     |     |     |                     |     |     |     |                                             |     |     |     |                                    |     |     |     |                             |     |     |     |                                     |    |     |     |                                   |    |     |     |                      |    |     |     |
| Treatment planning                                                                                                                                                                                                                                                                                                                                                                                                        | 33%                                                                                                                                                                                                                                                                                                                                                                                                                                                                                                                                                                                                                                                                                                                                                                                                                                                                                                                                                                                                                                                                                                                                                                                           | 43%                   | 76%                     |                       |                         |                 |     |     |     |                     |     |     |     |                                             |     |     |     |                                    |     |     |     |                             |     |     |     |                                     |    |     |     |                                   |    |     |     |                      |    |     |     |
| Post treatment follow-up                                                                                                                                                                                                                                                                                                                                                                                                  | 31%                                                                                                                                                                                                                                                                                                                                                                                                                                                                                                                                                                                                                                                                                                                                                                                                                                                                                                                                                                                                                                                                                                                                                                                           | 42%                   | 73%                     |                       |                         |                 |     |     |     |                     |     |     |     |                                             |     |     |     |                                    |     |     |     |                             |     |     |     |                                     |    |     |     |                                   |    |     |     |                      |    |     |     |
| Information for patient management                                                                                                                                                                                                                                                                                                                                                                                        | 25%                                                                                                                                                                                                                                                                                                                                                                                                                                                                                                                                                                                                                                                                                                                                                                                                                                                                                                                                                                                                                                                                                                                                                                                           | 47%                   | 72%                     |                       |                         |                 |     |     |     |                     |     |     |     |                                             |     |     |     |                                    |     |     |     |                             |     |     |     |                                     |    |     |     |                                   |    |     |     |                      |    |     |     |
| Surveillance                                                                                                                                                                                                                                                                                                                                                                                                              | 25%                                                                                                                                                                                                                                                                                                                                                                                                                                                                                                                                                                                                                                                                                                                                                                                                                                                                                                                                                                                                                                                                                                                                                                                           | 42%                   | 67%                     |                       |                         |                 |     |     |     |                     |     |     |     |                                             |     |     |     |                                    |     |     |     |                             |     |     |     |                                     |    |     |     |                                   |    |     |     |                      |    |     |     |
| <p><b>Barriers to gadoxetic acid use</b></p> <p>The top reason for not using gadoxetic acid was cost, which applied to most countries. Radiologists were also satisfied with extracellular agents, which were incorporated into standardized reporting protocols. Another issue was arterial phase imaging with gadoxetic acid. Finally, there were other issues with workflow, difficulty interpreting washout, etc.</p> | <p><b>Barriers for gadoxetic acid use</b></p>  <table border="1"> <thead> <tr> <th>Barrier</th> <th>Extremely limiting (%)</th> <th>Somewhat limiting (%)</th> <th>Not at all limiting (%)</th> </tr> </thead> <tbody> <tr> <td>Cost</td> <td>13%</td> <td>57%</td> <td>30%</td> </tr> <tr> <td>Satisfied with ECCM</td> <td>9%</td> <td>53%</td> <td>37%</td> </tr> <tr> <td>Concerns relating to arterial phase imaging</td> <td>8%</td> <td>51%</td> <td>41%</td> </tr> <tr> <td>Workflow</td> <td>6%</td> <td>50%</td> <td>44%</td> </tr> <tr> <td>Concerns with linear agents</td> <td>7%</td> <td>49%</td> <td>45%</td> </tr> <tr> <td>Difficulties characterizing lesions</td> <td>7%</td> <td>45%</td> <td>49%</td> </tr> <tr> <td>Difficulties interpreting washout</td> <td>7%</td> <td>47%</td> <td>46%</td> </tr> <tr> <td>Referring physicians</td> <td>7%</td> <td>40%</td> <td>53%</td> </tr> </tbody> </table> <p>In 2016 research, workflow was identified as the 2<sup>nd</sup> most important barrier. With new codes added, this now is the 4<sup>th</sup> most important barrier.</p> | Barrier               | Extremely limiting (%)  | Somewhat limiting (%) | Not at all limiting (%) | Cost            | 13% | 57% | 30% | Satisfied with ECCM | 9%  | 53% | 37% | Concerns relating to arterial phase imaging | 8%  | 51% | 41% | Workflow                           | 6%  | 50% | 44% | Concerns with linear agents | 7%  | 49% | 45% | Difficulties characterizing lesions | 7% | 45% | 49% | Difficulties interpreting washout | 7% | 47% | 46% | Referring physicians | 7% | 40% | 53% |
| Barrier                                                                                                                                                                                                                                                                                                                                                                                                                   | Extremely limiting (%)                                                                                                                                                                                                                                                                                                                                                                                                                                                                                                                                                                                                                                                                                                                                                                                                                                                                                                                                                                                                                                                                                                                                                                        | Somewhat limiting (%) | Not at all limiting (%) |                       |                         |                 |     |     |     |                     |     |     |     |                                             |     |     |     |                                    |     |     |     |                             |     |     |     |                                     |    |     |     |                                   |    |     |     |                      |    |     |     |
| Cost                                                                                                                                                                                                                                                                                                                                                                                                                      | 13%                                                                                                                                                                                                                                                                                                                                                                                                                                                                                                                                                                                                                                                                                                                                                                                                                                                                                                                                                                                                                                                                                                                                                                                           | 57%                   | 30%                     |                       |                         |                 |     |     |     |                     |     |     |     |                                             |     |     |     |                                    |     |     |     |                             |     |     |     |                                     |    |     |     |                                   |    |     |     |                      |    |     |     |
| Satisfied with ECCM                                                                                                                                                                                                                                                                                                                                                                                                       | 9%                                                                                                                                                                                                                                                                                                                                                                                                                                                                                                                                                                                                                                                                                                                                                                                                                                                                                                                                                                                                                                                                                                                                                                                            | 53%                   | 37%                     |                       |                         |                 |     |     |     |                     |     |     |     |                                             |     |     |     |                                    |     |     |     |                             |     |     |     |                                     |    |     |     |                                   |    |     |     |                      |    |     |     |
| Concerns relating to arterial phase imaging                                                                                                                                                                                                                                                                                                                                                                               | 8%                                                                                                                                                                                                                                                                                                                                                                                                                                                                                                                                                                                                                                                                                                                                                                                                                                                                                                                                                                                                                                                                                                                                                                                            | 51%                   | 41%                     |                       |                         |                 |     |     |     |                     |     |     |     |                                             |     |     |     |                                    |     |     |     |                             |     |     |     |                                     |    |     |     |                                   |    |     |     |                      |    |     |     |
| Workflow                                                                                                                                                                                                                                                                                                                                                                                                                  | 6%                                                                                                                                                                                                                                                                                                                                                                                                                                                                                                                                                                                                                                                                                                                                                                                                                                                                                                                                                                                                                                                                                                                                                                                            | 50%                   | 44%                     |                       |                         |                 |     |     |     |                     |     |     |     |                                             |     |     |     |                                    |     |     |     |                             |     |     |     |                                     |    |     |     |                                   |    |     |     |                      |    |     |     |
| Concerns with linear agents                                                                                                                                                                                                                                                                                                                                                                                               | 7%                                                                                                                                                                                                                                                                                                                                                                                                                                                                                                                                                                                                                                                                                                                                                                                                                                                                                                                                                                                                                                                                                                                                                                                            | 49%                   | 45%                     |                       |                         |                 |     |     |     |                     |     |     |     |                                             |     |     |     |                                    |     |     |     |                             |     |     |     |                                     |    |     |     |                                   |    |     |     |                      |    |     |     |
| Difficulties characterizing lesions                                                                                                                                                                                                                                                                                                                                                                                       | 7%                                                                                                                                                                                                                                                                                                                                                                                                                                                                                                                                                                                                                                                                                                                                                                                                                                                                                                                                                                                                                                                                                                                                                                                            | 45%                   | 49%                     |                       |                         |                 |     |     |     |                     |     |     |     |                                             |     |     |     |                                    |     |     |     |                             |     |     |     |                                     |    |     |     |                                   |    |     |     |                      |    |     |     |
| Difficulties interpreting washout                                                                                                                                                                                                                                                                                                                                                                                         | 7%                                                                                                                                                                                                                                                                                                                                                                                                                                                                                                                                                                                                                                                                                                                                                                                                                                                                                                                                                                                                                                                                                                                                                                                            | 47%                   | 46%                     |                       |                         |                 |     |     |     |                     |     |     |     |                                             |     |     |     |                                    |     |     |     |                             |     |     |     |                                     |    |     |     |                                   |    |     |     |                      |    |     |     |
| Referring physicians                                                                                                                                                                                                                                                                                                                                                                                                      | 7%                                                                                                                                                                                                                                                                                                                                                                                                                                                                                                                                                                                                                                                                                                                                                                                                                                                                                                                                                                                                                                                                                                                                                                                            | 40%                   | 53%                     |                       |                         |                 |     |     |     |                     |     |     |     |                                             |     |     |     |                                    |     |     |     |                             |     |     |     |                                     |    |     |     |                                   |    |     |     |                      |    |     |     |

Survey results showed that the LiRADS group has gained widespread acceptance—globally around 78%. In Japan, 90% of surveyed radiologists were using local guidelines from the Japanese Society of Hepatology and only 32% were using LiRADS. Interestingly, the United States Organ Procurement and Transplantation Network (OPTN) guidance was used by 20% of surveyed radiologists in China.

### LiRADS is the most commonly used classification system for HCC (except Japan/Korea)

| % radiologists using each of the following classification systems                 | LiRADS | OPTN | EASL | APASL | JSH | Korean Guidelines |
|-----------------------------------------------------------------------------------|--------|------|------|-------|-----|-------------------|
| Global                                                                            | 78%    | 11%  | 24%  | 22%   | 14% | 5%                |
|  | 95%    | 7%   | 4%   | 0%    |     |                   |
|  | 63%    | 4%   | 35%  | 3%    |     |                   |
|  | 71%    | 4%   | 44%  | 8%    |     |                   |
|  | 87%    | 20%  | 45%  | 48%   |     |                   |
|  | 66%    | 0%   | 0%   | 2%    |     | 98%               |
|  | 33%    | 3%   | 7%   | 7%    | 90% |                   |

### Gadoxetic acid dosing

There was variation in the dosing used: some radiologists used a fixed dose of 10 mL (related to the desire to avoid waste), but ~55–93% of surveyed radiologists were using a Food and Drug Administration- or European Medicines Agency-approved dose of 0.1 mL/kg (radiologists from Japan and USA were not surveyed).

### Weight-based dosing is most common

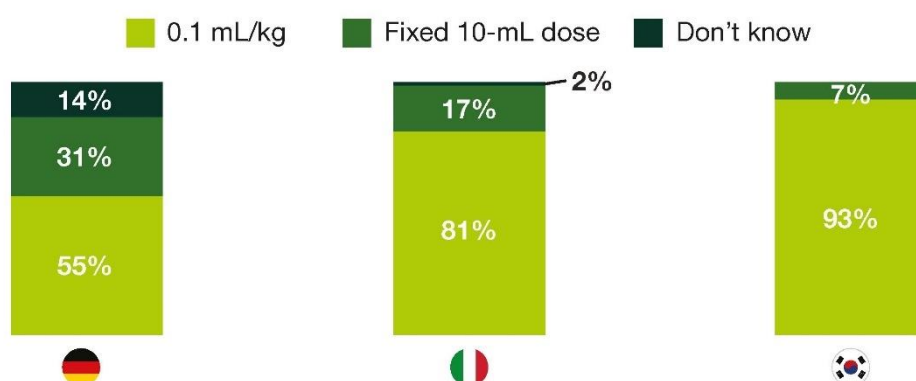

| <p><b>Protocol for arterial phase imaging</b></p> <p>The protocol used for arterial phase imaging with gadoxetic acid also showed regional variation. The top three methods were: fixed delay, a test bolus for arterial phase timing, or fluoroscopic triggering/automated bolus detection algorithm.</p> | <p><b>Arterial phase timing techniques for gadoxetic acid</b></p> <p>Arterial phase timing techniques used (% radiologists using each most frequently)<br/>Base: gadoxetic acid users, <math>n = 412</math></p> <table border="1"> <thead> <tr> <th>Technique</th> <th>USA</th> <th>Germany</th> <th>Italy</th> <th>China</th> <th>South Korea</th> <th>Japan</th> </tr> </thead> <tbody> <tr> <td>Fixed delay</td> <td>37%</td> <td>24%</td> <td>17%</td> <td>24%</td> <td>22%</td> <td>19%</td> </tr> <tr> <td>Test bolus timing</td> <td>23%</td> <td>27%</td> <td>29%</td> <td>17%</td> <td>54%</td> <td>34%</td> </tr> <tr> <td>Fluoroscopic triggering / automated bolus detection algorithm</td> <td>13%</td> <td>11%</td> <td>40%</td> <td>32%</td> <td>10%</td> <td>29%</td> </tr> <tr> <td>Time-resolved imaging</td> <td>16%</td> <td>30%</td> <td>8%</td> <td>22%</td> <td>2%</td> <td>-</td> </tr> <tr> <td>Don't know</td> <td>9%</td> <td></td> <td></td> <td></td> <td></td> <td></td> </tr> </tbody> </table> <p>Most commonly referenced arterial phase timing techniques</p> | Technique | USA                           | Germany | Italy       | China | South Korea | Japan   | Fixed delay | 37%           | 24% | 17%                           | 24% | 22%            | 19% | Test bolus timing | 23% | 27%   | 29% | 17%    | 54% | 34%   | Fluoroscopic triggering / automated bolus detection algorithm | 13% | 11% | 40% | 32% | 10% | 29% | Time-resolved imaging | 16% | 30% | 8% | 22% | 2% | - | Don't know | 9% |  |  |  |  |  |
|------------------------------------------------------------------------------------------------------------------------------------------------------------------------------------------------------------------------------------------------------------------------------------------------------------|-------------------------------------------------------------------------------------------------------------------------------------------------------------------------------------------------------------------------------------------------------------------------------------------------------------------------------------------------------------------------------------------------------------------------------------------------------------------------------------------------------------------------------------------------------------------------------------------------------------------------------------------------------------------------------------------------------------------------------------------------------------------------------------------------------------------------------------------------------------------------------------------------------------------------------------------------------------------------------------------------------------------------------------------------------------------------------------------------|-----------|-------------------------------|---------|-------------|-------|-------------|---------|-------------|---------------|-----|-------------------------------|-----|----------------|-----|-------------------|-----|-------|-----|--------|-----|-------|---------------------------------------------------------------|-----|-----|-----|-----|-----|-----|-----------------------|-----|-----|----|-----|----|---|------------|----|--|--|--|--|--|
| Technique                                                                                                                                                                                                                                                                                                  | USA                                                                                                                                                                                                                                                                                                                                                                                                                                                                                                                                                                                                                                                                                                                                                                                                                                                                                                                                                                                                                                                                                             | Germany   | Italy                         | China   | South Korea | Japan |             |         |             |               |     |                               |     |                |     |                   |     |       |     |        |     |       |                                                               |     |     |     |     |     |     |                       |     |     |    |     |    |   |            |    |  |  |  |  |  |
| Fixed delay                                                                                                                                                                                                                                                                                                | 37%                                                                                                                                                                                                                                                                                                                                                                                                                                                                                                                                                                                                                                                                                                                                                                                                                                                                                                                                                                                                                                                                                             | 24%       | 17%                           | 24%     | 22%         | 19%   |             |         |             |               |     |                               |     |                |     |                   |     |       |     |        |     |       |                                                               |     |     |     |     |     |     |                       |     |     |    |     |    |   |            |    |  |  |  |  |  |
| Test bolus timing                                                                                                                                                                                                                                                                                          | 23%                                                                                                                                                                                                                                                                                                                                                                                                                                                                                                                                                                                                                                                                                                                                                                                                                                                                                                                                                                                                                                                                                             | 27%       | 29%                           | 17%     | 54%         | 34%   |             |         |             |               |     |                               |     |                |     |                   |     |       |     |        |     |       |                                                               |     |     |     |     |     |     |                       |     |     |    |     |    |   |            |    |  |  |  |  |  |
| Fluoroscopic triggering / automated bolus detection algorithm                                                                                                                                                                                                                                              | 13%                                                                                                                                                                                                                                                                                                                                                                                                                                                                                                                                                                                                                                                                                                                                                                                                                                                                                                                                                                                                                                                                                             | 11%       | 40%                           | 32%     | 10%         | 29%   |             |         |             |               |     |                               |     |                |     |                   |     |       |     |        |     |       |                                                               |     |     |     |     |     |     |                       |     |     |    |     |    |   |            |    |  |  |  |  |  |
| Time-resolved imaging                                                                                                                                                                                                                                                                                      | 16%                                                                                                                                                                                                                                                                                                                                                                                                                                                                                                                                                                                                                                                                                                                                                                                                                                                                                                                                                                                                                                                                                             | 30%       | 8%                            | 22%     | 2%          | -     |             |         |             |               |     |                               |     |                |     |                   |     |       |     |        |     |       |                                                               |     |     |     |     |     |     |                       |     |     |    |     |    |   |            |    |  |  |  |  |  |
| Don't know                                                                                                                                                                                                                                                                                                 | 9%                                                                                                                                                                                                                                                                                                                                                                                                                                                                                                                                                                                                                                                                                                                                                                                                                                                                                                                                                                                                                                                                                              |           |                               |         |             |       |             |         |             |               |     |                               |     |                |     |                   |     |       |     |        |     |       |                                                               |     |     |     |     |     |     |                       |     |     |    |     |    |   |            |    |  |  |  |  |  |
| <p><b>Vendors used by the radiologists</b></p> <p>Globally, about half the surveyed radiologists were using a Siemens scanner, followed by GE, then Philips. Field strength was basically equal between 3T and 1.5T.</p>                                                                                   | <p><b>Scanner vendors and field strengths for gadoxetic acid-MRI</b></p> <p><b>Vendors</b><br/>% radiologists using each for gadoxetic acid-MRI<br/>Base: gadoxetic acid users, <math>n = 412</math></p> <table border="1"> <thead> <tr> <th>Vendor</th> <th>%</th> </tr> </thead> <tbody> <tr> <td>Siemens</td> <td>51%</td> </tr> <tr> <td>GE</td> <td>39%</td> </tr> <tr> <td>Philips</td> <td>32%</td> </tr> <tr> <td>Canon/Toshiba</td> <td>4%</td> </tr> <tr> <td>Fujifilm/Hitachi (Japan only)</td> <td>3%</td> </tr> </tbody> </table> <p><b>Field strength</b><br/>% radiologists using each for gadoxetic acid-MRI<br/>Base: gadoxetic acid users, <math>n = 412</math></p> <table border="1"> <thead> <tr> <th>Field strength</th> <th>%</th> </tr> </thead> <tbody> <tr> <td>3 T</td> <td>63%</td> </tr> <tr> <td>1.5 T</td> <td>60%</td> </tr> <tr> <td>0.55 T</td> <td>3%</td> </tr> <tr> <td>0.5 T</td> <td>1%</td> </tr> <tr> <td>7 T</td> <td>1%</td> </tr> </tbody> </table> <p>Greater in South Korea (95%)<br/>Greater in Italy (94%)</p>                                   | Vendor    | %                             | Siemens | 51%         | GE    | 39%         | Philips | 32%         | Canon/Toshiba | 4%  | Fujifilm/Hitachi (Japan only) | 3%  | Field strength | %   | 3 T               | 63% | 1.5 T | 60% | 0.55 T | 3%  | 0.5 T | 1%                                                            | 7 T | 1%  |     |     |     |     |                       |     |     |    |     |    |   |            |    |  |  |  |  |  |
| Vendor                                                                                                                                                                                                                                                                                                     | %                                                                                                                                                                                                                                                                                                                                                                                                                                                                                                                                                                                                                                                                                                                                                                                                                                                                                                                                                                                                                                                                                               |           |                               |         |             |       |             |         |             |               |     |                               |     |                |     |                   |     |       |     |        |     |       |                                                               |     |     |     |     |     |     |                       |     |     |    |     |    |   |            |    |  |  |  |  |  |
| Siemens                                                                                                                                                                                                                                                                                                    | 51%                                                                                                                                                                                                                                                                                                                                                                                                                                                                                                                                                                                                                                                                                                                                                                                                                                                                                                                                                                                                                                                                                             |           |                               |         |             |       |             |         |             |               |     |                               |     |                |     |                   |     |       |     |        |     |       |                                                               |     |     |     |     |     |     |                       |     |     |    |     |    |   |            |    |  |  |  |  |  |
| GE                                                                                                                                                                                                                                                                                                         | 39%                                                                                                                                                                                                                                                                                                                                                                                                                                                                                                                                                                                                                                                                                                                                                                                                                                                                                                                                                                                                                                                                                             |           |                               |         |             |       |             |         |             |               |     |                               |     |                |     |                   |     |       |     |        |     |       |                                                               |     |     |     |     |     |     |                       |     |     |    |     |    |   |            |    |  |  |  |  |  |
| Philips                                                                                                                                                                                                                                                                                                    | 32%                                                                                                                                                                                                                                                                                                                                                                                                                                                                                                                                                                                                                                                                                                                                                                                                                                                                                                                                                                                                                                                                                             |           |                               |         |             |       |             |         |             |               |     |                               |     |                |     |                   |     |       |     |        |     |       |                                                               |     |     |     |     |     |     |                       |     |     |    |     |    |   |            |    |  |  |  |  |  |
| Canon/Toshiba                                                                                                                                                                                                                                                                                              | 4%                                                                                                                                                                                                                                                                                                                                                                                                                                                                                                                                                                                                                                                                                                                                                                                                                                                                                                                                                                                                                                                                                              |           |                               |         |             |       |             |         |             |               |     |                               |     |                |     |                   |     |       |     |        |     |       |                                                               |     |     |     |     |     |     |                       |     |     |    |     |    |   |            |    |  |  |  |  |  |
| Fujifilm/Hitachi (Japan only)                                                                                                                                                                                                                                                                              | 3%                                                                                                                                                                                                                                                                                                                                                                                                                                                                                                                                                                                                                                                                                                                                                                                                                                                                                                                                                                                                                                                                                              |           |                               |         |             |       |             |         |             |               |     |                               |     |                |     |                   |     |       |     |        |     |       |                                                               |     |     |     |     |     |     |                       |     |     |    |     |    |   |            |    |  |  |  |  |  |
| Field strength                                                                                                                                                                                                                                                                                             | %                                                                                                                                                                                                                                                                                                                                                                                                                                                                                                                                                                                                                                                                                                                                                                                                                                                                                                                                                                                                                                                                                               |           |                               |         |             |       |             |         |             |               |     |                               |     |                |     |                   |     |       |     |        |     |       |                                                               |     |     |     |     |     |     |                       |     |     |    |     |    |   |            |    |  |  |  |  |  |
| 3 T                                                                                                                                                                                                                                                                                                        | 63%                                                                                                                                                                                                                                                                                                                                                                                                                                                                                                                                                                                                                                                                                                                                                                                                                                                                                                                                                                                                                                                                                             |           |                               |         |             |       |             |         |             |               |     |                               |     |                |     |                   |     |       |     |        |     |       |                                                               |     |     |     |     |     |     |                       |     |     |    |     |    |   |            |    |  |  |  |  |  |
| 1.5 T                                                                                                                                                                                                                                                                                                      | 60%                                                                                                                                                                                                                                                                                                                                                                                                                                                                                                                                                                                                                                                                                                                                                                                                                                                                                                                                                                                                                                                                                             |           |                               |         |             |       |             |         |             |               |     |                               |     |                |     |                   |     |       |     |        |     |       |                                                               |     |     |     |     |     |     |                       |     |     |    |     |    |   |            |    |  |  |  |  |  |
| 0.55 T                                                                                                                                                                                                                                                                                                     | 3%                                                                                                                                                                                                                                                                                                                                                                                                                                                                                                                                                                                                                                                                                                                                                                                                                                                                                                                                                                                                                                                                                              |           |                               |         |             |       |             |         |             |               |     |                               |     |                |     |                   |     |       |     |        |     |       |                                                               |     |     |     |     |     |     |                       |     |     |    |     |    |   |            |    |  |  |  |  |  |
| 0.5 T                                                                                                                                                                                                                                                                                                      | 1%                                                                                                                                                                                                                                                                                                                                                                                                                                                                                                                                                                                                                                                                                                                                                                                                                                                                                                                                                                                                                                                                                              |           |                               |         |             |       |             |         |             |               |     |                               |     |                |     |                   |     |       |     |        |     |       |                                                               |     |     |     |     |     |     |                       |     |     |    |     |    |   |            |    |  |  |  |  |  |
| 7 T                                                                                                                                                                                                                                                                                                        | 1%                                                                                                                                                                                                                                                                                                                                                                                                                                                                                                                                                                                                                                                                                                                                                                                                                                                                                                                                                                                                                                                                                              |           |                               |         |             |       |             |         |             |               |     |                               |     |                |     |                   |     |       |     |        |     |       |                                                               |     |     |     |     |     |     |                       |     |     |    |     |    |   |            |    |  |  |  |  |  |
| <p><b>Abbreviated protocols with gadoxetic acid</b></p> <p>Globally, approximately one third of surveyed radiologists were using some form of abbreviated protocol: from 39% in China (the highest percentage) to 20% in Japan.</p>                                                                        | <p><b>Globally, ~1/3 are using abbreviated protocols</b></p> <table border="1"> <thead> <tr> <th>Country</th> <th>% Using abbreviated protocols</th> </tr> </thead> <tbody> <tr> <td>China</td> <td>39%</td> </tr> <tr> <td>Italy</td> <td>37%</td> </tr> <tr> <td>USA</td> <td>31%</td> </tr> <tr> <td>Germany</td> <td>28%</td> </tr> <tr> <td>South Korea</td> <td>20%</td> </tr> <tr> <td>Japan</td> <td>20%</td> </tr> </tbody> </table> <p>■ Using abbreviated protocols ■ Not using/unsure</p>                                                                                                                                                                                                                                                                                                                                                                                                                                                                                                                                                                                           | Country   | % Using abbreviated protocols | China   | 39%         | Italy | 37%         | USA     | 31%         | Germany       | 28% | South Korea                   | 20% | Japan          | 20% |                   |     |       |     |        |     |       |                                                               |     |     |     |     |     |     |                       |     |     |    |     |    |   |            |    |  |  |  |  |  |
| Country                                                                                                                                                                                                                                                                                                    | % Using abbreviated protocols                                                                                                                                                                                                                                                                                                                                                                                                                                                                                                                                                                                                                                                                                                                                                                                                                                                                                                                                                                                                                                                                   |           |                               |         |             |       |             |         |             |               |     |                               |     |                |     |                   |     |       |     |        |     |       |                                                               |     |     |     |     |     |     |                       |     |     |    |     |    |   |            |    |  |  |  |  |  |
| China                                                                                                                                                                                                                                                                                                      | 39%                                                                                                                                                                                                                                                                                                                                                                                                                                                                                                                                                                                                                                                                                                                                                                                                                                                                                                                                                                                                                                                                                             |           |                               |         |             |       |             |         |             |               |     |                               |     |                |     |                   |     |       |     |        |     |       |                                                               |     |     |     |     |     |     |                       |     |     |    |     |    |   |            |    |  |  |  |  |  |
| Italy                                                                                                                                                                                                                                                                                                      | 37%                                                                                                                                                                                                                                                                                                                                                                                                                                                                                                                                                                                                                                                                                                                                                                                                                                                                                                                                                                                                                                                                                             |           |                               |         |             |       |             |         |             |               |     |                               |     |                |     |                   |     |       |     |        |     |       |                                                               |     |     |     |     |     |     |                       |     |     |    |     |    |   |            |    |  |  |  |  |  |
| USA                                                                                                                                                                                                                                                                                                        | 31%                                                                                                                                                                                                                                                                                                                                                                                                                                                                                                                                                                                                                                                                                                                                                                                                                                                                                                                                                                                                                                                                                             |           |                               |         |             |       |             |         |             |               |     |                               |     |                |     |                   |     |       |     |        |     |       |                                                               |     |     |     |     |     |     |                       |     |     |    |     |    |   |            |    |  |  |  |  |  |
| Germany                                                                                                                                                                                                                                                                                                    | 28%                                                                                                                                                                                                                                                                                                                                                                                                                                                                                                                                                                                                                                                                                                                                                                                                                                                                                                                                                                                                                                                                                             |           |                               |         |             |       |             |         |             |               |     |                               |     |                |     |                   |     |       |     |        |     |       |                                                               |     |     |     |     |     |     |                       |     |     |    |     |    |   |            |    |  |  |  |  |  |
| South Korea                                                                                                                                                                                                                                                                                                | 20%                                                                                                                                                                                                                                                                                                                                                                                                                                                                                                                                                                                                                                                                                                                                                                                                                                                                                                                                                                                                                                                                                             |           |                               |         |             |       |             |         |             |               |     |                               |     |                |     |                   |     |       |     |        |     |       |                                                               |     |     |     |     |     |     |                       |     |     |    |     |    |   |            |    |  |  |  |  |  |
| Japan                                                                                                                                                                                                                                                                                                      | 20%                                                                                                                                                                                                                                                                                                                                                                                                                                                                                                                                                                                                                                                                                                                                                                                                                                                                                                                                                                                                                                                                                             |           |                               |         |             |       |             |         |             |               |     |                               |     |                |     |                   |     |       |     |        |     |       |                                                               |     |     |     |     |     |     |                       |     |     |    |     |    |   |            |    |  |  |  |  |  |

| <p>The scenarios for using abbreviated protocols with gadoxetic acid varied. The top indication was initial diagnosis of liver metastases, which is an interesting finding. We assume that HCC diagnosis is an additional use of the abbreviated protocol, but we did not ask that question.</p>                                                                                                                                                                                                                                                                                                                                      | <p><b>Abbreviated protocols are used across different clinical scenarios</b></p> <p>Clinical scenarios where abbreviated protocols are used (% radiologists selection each)<br/>Base: radiologists using abbreviated protocols (n = 123)</p> <table border="1"> <thead> <tr> <th>Clinical Scenario</th> <th>Percentage</th> </tr> </thead> <tbody> <tr> <td>Initial diagnosis of liver metastases</td> <td>68%</td> </tr> <tr> <td>HCC screening</td> <td>56%</td> </tr> <tr> <td>HCC follow-up</td> <td>55%</td> </tr> <tr> <td>Liver metastases follow-up</td> <td>48%</td> </tr> <tr> <td>Other</td> <td>3%</td> </tr> </tbody> </table> <p><i>Single mentions: FNH assessment, differential diagnosis of liver lesion, dynamic enforcement</i></p> | Clinical Scenario | Percentage | Initial diagnosis of liver metastases | 68% | HCC screening   | 56% | HCC follow-up | 55% | Liver metastases follow-up | 48% | Other | 3% |
|---------------------------------------------------------------------------------------------------------------------------------------------------------------------------------------------------------------------------------------------------------------------------------------------------------------------------------------------------------------------------------------------------------------------------------------------------------------------------------------------------------------------------------------------------------------------------------------------------------------------------------------|--------------------------------------------------------------------------------------------------------------------------------------------------------------------------------------------------------------------------------------------------------------------------------------------------------------------------------------------------------------------------------------------------------------------------------------------------------------------------------------------------------------------------------------------------------------------------------------------------------------------------------------------------------------------------------------------------------------------------------------------------------|-------------------|------------|---------------------------------------|-----|-----------------|-----|---------------|-----|----------------------------|-----|-------|----|
| Clinical Scenario                                                                                                                                                                                                                                                                                                                                                                                                                                                                                                                                                                                                                     | Percentage                                                                                                                                                                                                                                                                                                                                                                                                                                                                                                                                                                                                                                                                                                                                             |                   |            |                                       |     |                 |     |               |     |                            |     |       |    |
| Initial diagnosis of liver metastases                                                                                                                                                                                                                                                                                                                                                                                                                                                                                                                                                                                                 | 68%                                                                                                                                                                                                                                                                                                                                                                                                                                                                                                                                                                                                                                                                                                                                                    |                   |            |                                       |     |                 |     |               |     |                            |     |       |    |
| HCC screening                                                                                                                                                                                                                                                                                                                                                                                                                                                                                                                                                                                                                         | 56%                                                                                                                                                                                                                                                                                                                                                                                                                                                                                                                                                                                                                                                                                                                                                    |                   |            |                                       |     |                 |     |               |     |                            |     |       |    |
| HCC follow-up                                                                                                                                                                                                                                                                                                                                                                                                                                                                                                                                                                                                                         | 55%                                                                                                                                                                                                                                                                                                                                                                                                                                                                                                                                                                                                                                                                                                                                                    |                   |            |                                       |     |                 |     |               |     |                            |     |       |    |
| Liver metastases follow-up                                                                                                                                                                                                                                                                                                                                                                                                                                                                                                                                                                                                            | 48%                                                                                                                                                                                                                                                                                                                                                                                                                                                                                                                                                                                                                                                                                                                                                    |                   |            |                                       |     |                 |     |               |     |                            |     |       |    |
| Other                                                                                                                                                                                                                                                                                                                                                                                                                                                                                                                                                                                                                                 | 3%                                                                                                                                                                                                                                                                                                                                                                                                                                                                                                                                                                                                                                                                                                                                                     |                   |            |                                       |     |                 |     |               |     |                            |     |       |    |
| <p><b>Perception of abbreviated protocols</b></p> <p>84% of surveyed radiologists considered that abbreviated MRI protocols were better or significantly better than US for HCC screening and surveillance.</p>                                                                                                                                                                                                                                                                                                                                                                                                                       | <p><b>Perception of abbreviated MRI protocols: perform better than US for HCC screening</b></p> <p>Perception of abbreviated protocol versus ultrasound for HCC screening (% radiologists using abbreviated protocols)<br/>Base: radiologists using abbreviated protocols (n = 123)</p> <table border="1"> <thead> <tr> <th>Perception</th> <th>Percentage</th> </tr> </thead> <tbody> <tr> <td>Significantly better</td> <td>53%</td> </tr> <tr> <td>Slightly better</td> <td>31%</td> </tr> <tr> <td>Equivalent</td> <td>10%</td> </tr> <tr> <td>Slightly worse</td> <td>6%</td> </tr> </tbody> </table>                                                                                                                                             | Perception        | Percentage | Significantly better                  | 53% | Slightly better | 31% | Equivalent    | 10% | Slightly worse             | 6%  |       |    |
| Perception                                                                                                                                                                                                                                                                                                                                                                                                                                                                                                                                                                                                                            | Percentage                                                                                                                                                                                                                                                                                                                                                                                                                                                                                                                                                                                                                                                                                                                                             |                   |            |                                       |     |                 |     |               |     |                            |     |       |    |
| Significantly better                                                                                                                                                                                                                                                                                                                                                                                                                                                                                                                                                                                                                  | 53%                                                                                                                                                                                                                                                                                                                                                                                                                                                                                                                                                                                                                                                                                                                                                    |                   |            |                                       |     |                 |     |               |     |                            |     |       |    |
| Slightly better                                                                                                                                                                                                                                                                                                                                                                                                                                                                                                                                                                                                                       | 31%                                                                                                                                                                                                                                                                                                                                                                                                                                                                                                                                                                                                                                                                                                                                                    |                   |            |                                       |     |                 |     |               |     |                            |     |       |    |
| Equivalent                                                                                                                                                                                                                                                                                                                                                                                                                                                                                                                                                                                                                            | 10%                                                                                                                                                                                                                                                                                                                                                                                                                                                                                                                                                                                                                                                                                                                                                    |                   |            |                                       |     |                 |     |               |     |                            |     |       |    |
| Slightly worse                                                                                                                                                                                                                                                                                                                                                                                                                                                                                                                                                                                                                        | 6%                                                                                                                                                                                                                                                                                                                                                                                                                                                                                                                                                                                                                                                                                                                                                     |                   |            |                                       |     |                 |     |               |     |                            |     |       |    |
| <p><b>Summary of survey outcomes</b></p> <ul style="list-style-type: none"> <li>• Gadoxetic acid versus ECCM use is stable/minimally increased in USA/Europe.</li> <li>• Gadoxetic acid is used in 19–34% of cases.</li> <li>• Gadoxetic acid is used more often than ECCM in Asia.</li> <li>• Most radiologists viewed gadoxetic acid as a problem-solving agent.</li> <li>• Most radiology centers have contrast guidelines that reference gadoxetic acid.</li> <li>• Barriers to gadoxetic acid use are cost and satisfaction with ECCM.</li> <li>• There is a potential role for abbreviated MRI using gadoxetic acid.</li> </ul> |                                                                                                                                                                                                                                                                                                                                                                                                                                                                                                                                                                                                                                                                                                                                                        |                   |            |                                       |     |                 |     |               |     |                            |     |       |    |
